# Supplementary material for: Genomic insights into CKX genes: key players in cotton fibre development and abiotic stress responses
Source: PeerJ. 2024 May 30;12:e17462. doi: 10.7717/peerj.17462 (PMC11144395; doi:10.7717/peerj.17462)
Supplement: Supplemental Information 2 [file peerj-12-17462-s002.xlsx]

## Sheet: Table S2
Table S2. CKX genes and their renaming
G. arboreum (A2)		G. raimondii (D5)		G. hirsutum (AD1)		G. barbadense (AD2)
Gene ID	Rename	Gene ID	Rename	Gene ID	Rename	Gene ID	Rename
Ga01G1236.1	GaCKX01	Gorai.001G012300.1	GrCKX01	GH_A01G1119.1	GhCKX01A	GB_A01G1131.1	GbCKX01A
Ga03G0201.1	GaCKX02	Gorai.001G027500.1	GrCKX02	GH_A02G0187.1	GhCKX02A	GB_A02G0910.1	GbCKX02A
Ga03G0202.1	GaCKX03	Gorai.001G069600.1	GrCKX03	GH_A02G0191.1	GhCKX03A	GB_A02G0911.1	GbCKX03A
Ga03G0203.1	GaCKX04	Gorai.002G126300.1	GrCKX04	GH_A02G0915.1	GhCKX04A	GB_A03G1346.1	GbCKX04A
Ga03G0204.1	GaCKX05	Gorai.004G168300.1	GrCKX05	GH_A02G0916.1	GhCKX05A	GB_A04G1639.1	GbCKX05A
Ga03G0205.1	GaCKX06	Gorai.004G286300.1	GrCKX06	GH_A03G1289.1	GhCKX06A	GB_A04G1640.1	GbCKX06A
Ga03G0982.1	GaCKX07	Gorai.005G023500.1	GrCKX07	GH_A04G1592.1	GhCKX07A	GB_A05G0395.1	GbCKX07A
Ga03G0987.1	GaCKX08	Gorai.005G023600.1	GrCKX08	GH_A04G1593.1	GhCKX08A	GB_A05G1144.1	GbCKX08A
Ga04G0105.1	GaCKX09	Gorai.005G023800.1	GrCKX09	GH_A05G0390.1	GhCKX09A	GB_A05G1926.1	GbCKX09A
Ga04G1289.1	GaCKX10	Gorai.005G023900.1	GrCKX10	GH_A05G1899.1	GhCKX10A	GB_A05G3575.1	GbCKX10A
Ga05G0412.1	GaCKX11	Gorai.005G024000.1	GrCKX11	GH_A06G0063.1	GhCKX11A	GB_A06G0067.1	GbCKX11A
Ga05G1191.1	GaCKX12	Gorai.005G024100.1	GrCKX12	GH_A06G0787.1	GhCKX12A	GB_A06G0821.1	GbCKX12A
Ga05G2014.1	GaCKX13	Gorai.005G024300.1	GrCKX13	GH_A06G0907.1	GhCKX13A	GB_A06G0946.1	GbCKX13A
Ga06G0077.1	GaCKX14	Gorai.005G024500.1	GrCKX14	GH_A06G1334.1	GhCKX14A	GB_A06G1389.1	GbCKX14A
Ga06G0751.1	GaCKX15	Gorai.005G024600.1	GrCKX15	GH_A06G2090.1	GhCKX15A	GB_A06G2117.1	GbCKX15A
Ga06G0923.1	GaCKX16	Gorai.005G024700.1	GrCKX16	GH_A06G2093.1	GhCKX16A	GB_A06G2120.1	GbCKX16A
Ga06G2249.1	GaCKX17	Gorai.005G121800.1	GrCKX17	GH_A07G0124.1	GhCKX17A	GB_A07G0116.1	GbCKX17A
Ga06G2251.1	GaCKX18	Gorai.005G121900.1	GrCKX18	GH_A07G0687.1	GhCKX18A	GB_A07G0263.1	GbCKX18A
Ga06G2252.1	GaCKX19	Gorai.005G132900.1	GrCKX19	GH_A07G0688.1	GhCKX19A	GB_A07G0671.1	GbCKX19A
Ga07G0130.1	GaCKX20	Gorai.006G134800.1	GrCKX20	GH_A08G2811.1	GhCKX20A	GB_A07G0672.1	GbCKX20A
Ga07G0281.1	GaCKX21	Gorai.006G146800.1	GrCKX21	GH_A09G1369.1	GhCKX21A	GB_A08G2924.1	GbCKX21A
Ga07G0720.1	GaCKX22	Gorai.006G197300.1	GrCKX22	GH_A09G1479.1	GhCKX22A	GB_A09G1486.1	GbCKX22A
Ga07G0721.1	GaCKX23	Gorai.006G197400.1	GrCKX23	GH_A09G1953.1	GhCKX23A	GB_A09G1601.1	GbCKX23A
Ga08G1678.1	GaCKX24	Gorai.007G011000.1	GrCKX24	GH_A10G0062.1	GhCKX24A	GB_A10G0063.1	GbCKX24A
Ga08G2904.1	GaCKX25	Gorai.007G353900.1	GrCKX25	GH_A10G0064.1	GhCKX25A	GB_A10G0064.1	GbCKX25A
Ga09G1377.1	GaCKX26	Gorai.008G129900.1	GrCKX26	GH_A10G0968.1	GhCKX26A	GB_A10G0065.1	GbCKX26A
Ga09G1506.1	GaCKX27	Gorai.008G130100.1	GrCKX27	GH_A10G1415.1	GhCKX27A	GB_A10G0066.1	GbCKX27A
Ga09G2018.1	GaCKX28	Gorai.008G278700.1	GrCKX28	GH_A10G1609.1	GhCKX28A	GB_A10G0067.1	GbCKX28A
Ga09G2020.1	GaCKX29	Gorai.008G278800.1	GrCKX29	GH_A10G1692.1	GhCKX29A	GB_A10G0068.1	GbCKX29A
Ga10G0120.1	GaCKX30	Gorai.008G278900.1	GrCKX30	GH_A10G2677.1	GhCKX30A	GB_A10G0069.1	GbCKX30A
Ga10G1561.1	GaCKX31	Gorai.009G040700.1	GrCKX31	GH_A11G0095.1	GhCKX31A	GB_A10G0070.1	GbCKX31A
Ga10G1789.1	GaCKX32	Gorai.009G117200.1	GrCKX32	GH_A11G0097.1	GhCKX32A	GB_A10G0072.1	GbCKX32A
Ga10G1879.1	GaCKX33	Gorai.009G198300.1	GrCKX33	GH_A11G0098.1	GhCKX33A	GB_A10G1006.1	GbCKX33A
Ga10G2010.1	GaCKX34	Gorai.010G007500.1	GrCKX34	GH_A11G3512.1	GhCKX34A	GB_A10G1487.1	GbCKX34A
Ga10G2039.1	GaCKX35	Gorai.010G083400.1	GrCKX35	GH_A12G1324.1	GhCKX35A	GB_A10G1713.1	GbCKX35A
Ga10G3021.1	GaCKX36	Gorai.010G096700.1	GrCKX36	GH_A13G0135.1	GhCKX36A	GB_A10G1801.1	GbCKX36A
Ga10G3022.1	GaCKX37	Gorai.010G142800.1	GrCKX37	GH_A13G0259.1	GhCKX37A	GB_A10G2850.1	GbCKX37A
Ga10G3023.1	GaCKX38	Gorai.010G221400.1	GrCKX38	GH_A13G2171.1	GhCKX38A	GB_A11G0099.1	GbCKX38A
Ga10G3025.1	GaCKX39	Gorai.010G221500.1	GrCKX39	GH_A13G2225.1	GhCKX39A	GB_A11G0100.1	GbCKX39A
Ga10G3026.1	GaCKX40	Gorai.010G221700.1	GrCKX40	GH_D01G1177.1	GhCKX40D	GB_A11G0101.1	GbCKX40A
Ga10G3027.1	GaCKX41	Gorai.011G007000.1	GrCKX41	GH_D02G0198.1	GhCKX41D	GB_A11G3587.1	GbCKX41A
Ga10G3028.1	GaCKX42	Gorai.011G007100.1	GrCKX42	GH_D02G0199.1	GhCKX42D	GB_A12G1393.1	GbCKX42A
Ga10G3029.1	GaCKX43	Gorai.011G007200.1	GrCKX43	GH_D02G0201.1	GhCKX43D	GB_A12G1394.1	GbCKX43A
Ga10G3030.1	GaCKX44	Gorai.011G007300.1	GrCKX44	GH_D02G0202.1	GhCKX44D	GB_A12G2889.1	GbCKX44A
Ga10G3031.1	GaCKX45	Gorai.011G007400.1	GrCKX45	GH_D02G1121.1	GhCKX45D	GB_A13G0133.1	GbCKX45A
Ga10G3032.1	GaCKX46	Gorai.011G007500.1	GrCKX46	GH_D02G1126.1	GhCKX46D	GB_A13G0265.1	GbCKX46A
Ga11G0304.1	GaCKX47	Gorai.011G007700.1	GrCKX47	GH_D04G0740.1	GhCKX47D	GB_A13G2307.1	GbCKX47A
Ga11G4032.1	GaCKX48	Gorai.011G007800.1	GrCKX48	GH_D04G1941.1	GhCKX48D	GB_A13G2363.1	GbCKX48A
Ga11G4033.1	GaCKX49	Gorai.011G100400.1	GrCKX49	GH_D05G0393.1	GhCKX49D	GB_D01G1218.1	GbCKX49D
Ga11G4034.1	GaCKX50	Gorai.011G121800.1	GrCKX50	GH_D05G1131.1	GhCKX50D	GB_D02G0200.1	GbCKX50D
Ga12G0196.1	GaCKX51	Gorai.011G129700.1	GrCKX51	GH_D05G1936.1	GhCKX51D	GB_D02G0201.1	GbCKX51D
Ga12G0197.1	GaCKX52	Gorai.011G150800.1	GrCKX52	GH_D06G0049.1	GhCKX52D	GB_D02G0854.1	GbCKX52D
Ga12G0198.1	GaCKX53	Gorai.011G295400.1	GrCKX53	GH_D06G0765.1	GhCKX53D	GB_D02G1171.1	GbCKX53D
Ga12G0199.1	GaCKX54	Gorai.012G042400.1	GrCKX54	GH_D06G0907.1	GhCKX54D	GB_D02G1172.1	GbCKX54D
Ga12G1754.1	GaCKX55	Gorai.012G081000.1	GrCKX55	GH_D06G1375.1	GhCKX55D	GB_D02G1362.1	GbCKX55D
Ga12G1757.1	GaCKX56	Gorai.012G166900.1	GrCKX56	GH_D06G2130.1	GhCKX56D	GB_D02G1939.1	GbCKX56D
Ga13G0141.1	GaCKX57	Gorai.012G167000.1	GrCKX57	GH_D06G2131.1	GhCKX57D	GB_D04G0765.1	GbCKX57D
Ga13G0215.1	GaCKX58	Gorai.013G014800.1	GrCKX58	GH_D06G2133.1	GhCKX58D	GB_D04G2026.1	GbCKX58D
Ga13G0285.1	GaCKX59	Gorai.013G021500.1	GrCKX59	GH_D07G0131.1	GhCKX59D	GB_D05G0395.1	GbCKX59D
Ga13G2346.1	GaCKX60	Gorai.013G027900.1	GrCKX60	GH_D07G0283.1	GhCKX60D	GB_D05G1128.1	GbCKX60D
Ga13G2405.1	GaCKX61	Gorai.013G221000.1	GrCKX61	GH_D07G0679.1	GhCKX61D	GB_D05G1953.1	GbCKX61D
Ga14G1800.1	GaCKX62	Gorai.013G227400.1	GrCKX62	GH_D08G2804.1	GhCKX62D	GB_D06G0069.1	GbCKX62D
				GH_D09G1318.1	GhCKX63D	GB_D06G0807.1	GbCKX63D
				GH_D09G1432.1	GhCKX64D	GB_D06G0952.1	GbCKX64D
				GH_D09G2173.1	GhCKX65D	GB_D06G1414.1	GbCKX65D
				GH_D10G0068.1	GhCKX66D	GB_D06G2222.1	GbCKX66D
				GH_D10G0069.1	GhCKX67D	GB_D06G2223.1	GbCKX67D
				GH_D10G0070.1	GhCKX68D	GB_D06G2225.1	GbCKX68D
				GH_D10G0071.1	GhCKX69D	GB_D07G0125.1	GbCKX69D
				GH_D10G0072.1	GhCKX70D	GB_D07G0272.1	GbCKX70D
				GH_D10G0074.1	GhCKX71D	GB_D07G0676.1	GbCKX71D
				GH_D10G0075.1	GhCKX72D	GB_D08G2916.1	GbCKX72D
				GH_D10G0076.1	GhCKX73D	GB_D09G1323.1	GbCKX73D
				GH_D10G0989.1	GhCKX74D	GB_D09G1446.1	GbCKX74D
				GH_D10G1208.1	GhCKX75D	GB_D09G2193.1	GbCKX75D
				GH_D10G1282.1	GhCKX76D	GB_D10G0063.1	GbCKX76D
				GH_D10G1472.1	GhCKX77D	GB_D10G0064.1	GbCKX77D
				GH_D10G2783.1	GhCKX78D	GB_D10G0065.1	GbCKX78D
				GH_D11G3520.1	GhCKX79D	GB_D10G0066.1	GbCKX79D
				GH_D12G1342.1	GhCKX80D	GB_D10G0067.1	GbCKX80D
				GH_D12G1344.1	GhCKX81D	GB_D10G0069.1	GbCKX81D
				GH_D13G0136.1	GhCKX82D	GB_D10G0072.1	GbCKX82D
				GH_D13G0194.1	GhCKX83D	GB_D10G0073.1	GbCKX83D
				GH_D13G0256.1	GhCKX84D	GB_D10G0977.1	GbCKX84D
				GH_D13G2153.1	GhCKX85D	GB_D10G1197.1	GbCKX85D
				GH_D13G2207.1	GhCKX86D	GB_D10G1269.1	GbCKX86D
				GH_A10G2693.1	GhCKX87A	GB_D10G1458.1	GbCKX87D
						GB_D10G2807.1	GbCKX88D
						GB_D11G3564.1	GbCKX89D
						GB_D12G1388.1	GbCKX90D
						GB_D12G1390.1	GbCKX91D
						GB_D13G0130.1	GbCKX92D
						GB_D13G0187.1	GbCKX93D
						GB_D13G0253.1	GbCKX94D
						GB_D13G2255.1	GbCKX95D
						GB_D13G2314.1	GbCKX96D
