# Supplementary material for: Genomic insights into CKX genes: key players in cotton fibre development and abiotic stress responses
Source: PeerJ. 2024 May 30;12:e17462. doi: 10.7717/peerj.17462 (PMC11144395; doi:10.7717/peerj.17462)
Supplement: Supplemental Information 8 [file peerj-12-17462-s008.xlsx]

## Sheet: Cold Stress
Table S8. The Ct value of qPCR raw data.
	GhUBQ7			GHCKX16A
	Rep-1	Rep-2	Rep-3	Rep-1	Rep-2	Rep-3
Cs 1h	17.9751	17.9294	17.8841	25.4828	25.5227	25.3327
Cs 3h	17.4438	17.3318	17.2919	21.5272	21.5153	21.5471
Cs 6h	17.838	17.7416	17.7623	21.8167	21.8171	21.8185
Cs 12h	17.1954	17.098	17.0712	20.6822	20.6466	20.5642
Cs 24h	17.476	17.4857	17.3366	18.8082	18.8373	18.7695
Ctrl 1h	17.9199	17.8622	17.8358	25.4605	25.3955	25.5383
Ctrl 3h	17.3107	17.2499	17.2215	25.9049	25.9544	25.4758
Ctrl 6h	17.8074	17.7289	17.7276	23.5522	23.4766	23.6642
Ctrl 12h	17.1552	17.115	17.0603	22.7878	22.8306	22.705
Ctrl 24h	17.4301	17.4645	17.2917	23.5408	23.502	23.6809
	GhUBQ7			GHCKX58D
	Rep-1	Rep-2	Rep-3	Rep-1	Rep-2	Rep-3
Cs 1h	17.3385	17.3109	17.2446	25.378	25.362	25.3081
Cs 3h	16.6394	16.6706	16.5408	23.4772	23.4251	23.3438
Cs 6h	17.3385	17.3109	17.2446	22.1412	22.1103	22.2825
Cs 12h	17.3676	17.2777	17.2038	21.9397	21.9401	21.9415
Cs 24h	17.599	17.6087	17.4596	20.8052	20.7696	20.6872
Ctrl 1h	17.9304	17.8519	17.8506	27.7415	27.5566	27.781
Ctrl 3h	17.4337	17.3729	17.3445	27.171	27.2944	27.2328
Ctrl 6h	17.2782	17.238	17.1833	27.1041	26.9376	27.1375
Ctrl 12h	17.5531	17.5875	17.4147	26.8595	26.768	26.8432
Ctrl 24h	17.3676	17.2777	17.2038	24.9108	24.9536	24.828
	GhUBQ7			GHCKX34A
	Rep-1	Rep-2	Rep-3	Rep-1	Rep-2	Rep-3
Cs 1h	17.5724	17.4939	17.4926	27.3835	27.1986	27.423
Cs 3h	16.9805	16.9529	16.8866	25.02	25.004	24.9501
Cs 6h	16.2814	16.3126	16.1828	24.0039	24.0122	23.9741
Cs 12h	17.0096	16.9197	16.8458	21.5817	21.5821	21.5835
Cs 24h	16.0357	15.9919	15.8659	21.2922	21.2803	21.3121
Ctrl 1h	17.6849	17.6272	17.6008	27.8006	27.6996	27.6164
Ctrl 3h	17.0757	17.0149	16.9865	26.813	26.9364	26.8748
Ctrl 6h	17.0096	16.9197	16.8458	25.5528	25.5956	25.47
Ctrl 12h	16.9202	16.88	16.8253	26.7461	26.5796	26.7795
Ctrl 24h	17.241	17.2507	17.1016	24.1377	23.9904	24.2321
	GhUBQ7			GHCKX84D
	Rep-1	Rep-2	Rep-3	Rep-1	Rep-2	Rep-3
Cs 1h	17.9099	17.8522	17.8258	26.5706	26.3526	26.3294
Cs 3h	17.2346	17.1447	17.0708	23.5308	23.492	23.6709
Cs 6h	16.2607	16.2169	16.0909	21.7012	21.603	21.6241
Cs 12h	17.2346	17.1447	17.0708	22.7778	22.8206	22.695
Cs 24h	17.7974	17.7189	17.7176	25.8949	25.9444	25.4658
Ctrl 1h	17.7974	17.7189	17.7176	27.6085	27.4236	27.648
Ctrl 3h	16.7716	16.6501	16.7273	27.0483	26.9261	26.8879
Ctrl 6h	16.9843	16.8831	16.8783	26.5848	26.8013	26.3124
Ctrl 12h	18.1742	18.1136	18.1568	28.538	28.3246	28.3186
Ctrl 24h	17.8472	17.7866	17.8298	28.211	27.9976	27.9916

## Sheet: Fiber development
	GhUBQ7				GHCKX29A
	Rep-1	Rep-2	Rep-3	Rep-1	Rep-2	Rep-3
TABLA 5DPA	18.2392	18.1786	18.2218	28.603	28.3896	28.3836
TABLA 10DPA	17.2102	17.17	17.1153	27.0361	26.8696	27.0695
TABLA 15DPA	17.8624	17.7839	17.7826	25.9599	26.0094	25.5308
TABLA 20DPA	17.3257	17.2819	17.1559	22.5822	22.5703	22.6021
TABLA 25DPA	16.2705	16.2429	17.1766	19.7949	19.8801	19.8086
Tab11 5DPA	16.8366	16.7151	16.7923	27.1133	26.9911	26.9529
Tab11 10DPA	17.2705	17.2429	17.1766	25.31	25.294	25.2401
Tab11 15DPA	16.5714	16.6026	16.4728	24.2939	24.3022	24.2641
Tab11 20DPA	16.3257	16.2819	16.1559	22.4981	22.4616	22.5316
Tab11 25DPA	17.2996	17.2097	17.1358	21.8717	21.8721	21.8735
