# Supplementary material for: Genomic insights into CKX genes: key players in cotton fibre development and abiotic stress responses
Source: PeerJ. 2024 May 30;12:e17462. doi: 10.7717/peerj.17462 (PMC11144395; doi:10.7717/peerj.17462)
Supplement: Supplemental Information 10 [file peerj-12-17462-s010.xls]

## Sheet: Sheet1
ITEM TO CHECK	IMPORTANCE	CHECKLIST
EXPERIMENTAL DESIGN
Definition of experimental and control groups	E	Done
Number within each group	E	Done
Assay carried out by core lab or investigator's lab?	D	Core lab
Acknowledgement of authors' contributions	D	Done
SAMPLE
Description	E	Done
Volume/mass of sample processed	D	Done
Microdissection or macrodissection	E	Macrodissection
Processing procedure	E	Done
If frozen - how and how quickly?	E	Samples were rapidly frozen in liquid nitrogen
If fixed - with what, how quickly?	E	Not fixed
Sample storage conditions and duration (especially for FFPE samples)	E	All samples were stored at −80 °C.
NUCLEIC ACID EXTRACTION
Procedure and/or instrumentation	E	Done
Name of kit and details of any modifications	E	Done
Source of additional reagents used	D
Details of DNase or RNAse treatment	E	Done
Contamination assessment (DNA or RNA)	E	Done
Nucleic acid quantification	E	Done
Instrument and method	E	Done
Purity (A260/A280)	D	1.9
Yield	D
RNA integrity method/instrument	E	Done
RIN/RQI or Cq of 3' and 5' transcripts	E	Done
Electrophoresis traces	D
Inhibition testing (Cq dilutions, spike or other)	E
REVERSE TRANSCRIPTION
Complete reaction conditions	E	Done
Amount of RNA and reaction volume	E	Done
Priming oligonucleotide (if using GSP) and concentration	E	Done
Reverse transcriptase and concentration	E	Done
Temperature and time	E	Done
Manufacturer of reagents and catalogue numbers	D	Done
Cqs with and without RT	D*	Done
Storage conditions of cDNA	D	Done
qPCR TARGET INFORMATION
If multiplex, efficiency and LOD of each assay.	E	Done
Sequence accession number	E	Done
Location of amplicon	D
Amplicon length	E	Done
In silico specificity screen (BLAST, etc)	E	Done
Pseudogenes, retropseudogenes or other homologs?	D
Sequence alignment	D
Secondary structure analysis of amplicon	D
Location of each primer by exon or intron (if applicable)	E	Done
What splice variants are targeted?	E
qPCR OLIGONUCLEOTIDES
Primer sequences	E	Done
RTPrimerDB Identification Number	D
Probe sequences	D**
Location and identity of any modifications	E	Done
Manufacturer of oligonucleotides	D
Purification method	D
qPCR PROTOCOL
Complete reaction conditions	E	Done
Reaction volume and amount of cDNA/DNA	E	Done
Primer, (probe), Mg++ and dNTP concentrations	E	Done
Polymerase identity and concentration	E	Done
Buffer/kit identity and manufacturer	E	Done
Exact chemical constitution of the buffer	D	Done
Additives (SYBR Green I, DMSO, etc.)	E	Done
Manufacturer of plates/tubes and catalog number	D	Done
Complete thermocycling parameters	E	Done
Reaction setup (manual/robotic)	D	Done
Manufacturer of qPCR instrument	E	Done
qPCR VALIDATION
Evidence of optimisation (from gradients)	D	Done
Specificity (gel, sequence, melt, or digest)	E	Done
For SYBR Green I, Cq of the NTC	E	Done
Standard curves with slope and y-intercept	E	Done
PCR efficiency calculated from slope	E	Done
Confidence interval for PCR efficiency or standard error	D	Done
r2 of standard curve	E	Done
Linear dynamic range	E	Done
Cq variation at lower limit	E	Done
Confidence intervals throughout range	D	Done
Evidence for limit of detection	E
If multiplex, efficiency and LOD of each assay.	E
DATA ANALYSIS
qPCR analysis program (source, version)	E	Done
Cq method determination	E	Done
Outlier identification and disposition	E	Done
Results of NTCs	E	Done
Justification of number and choice of reference genes	E	Done
Description of normalisation method	E	Done
Number and concordance of biological replicates	D	Done
Number and stage (RT or qPCR) of technical replicates	E	Done
Repeatability (intra-assay variation)	E	Done
Reproducibility (inter-assay variation, %CV)	D
Power analysis	D
Statistical methods for result significance	E	Done
Software (source, version)	E	Done
Cq or raw data submission using RDML	D	Done
Table 1. MIQE checklist for authors, reviewers and editors. All essential information (E) must be submitted with the manuscript. Desirable
information (D) should be submitted if available. If using primers obtained from RTPrimerDB, information on qPCR target, oligonucleotides,
protocols and validation is available from that source.
*: Assessing the absence of DNA using a no RT assay is essential when first extracting RNA. Once the sample has been validated as
RDNA-free, inclusion of a no-RT control is desirable, but no longer essential.
**: Disclosure of the probe sequence is highly desirable and strongly encouraged. However, since not all commercial pre-designed assay
vendors provide this information, it cannot be an essential requirement. Use of such assays is advised against.
